# Supplementary material for: Effects of highly conductive PH1000 anode in combination with ethylene glycol additive and H2SO4 immersion treatments on photovoltaic performance and photostability of polymer solar cells
Source: Royal Society of Chemistry journal article supplement (doi:10.1039/c8tc02467g), 2018-01-01
Supplement: c8tc02467g1.pdf [file c8tc02467g1.pdf]

**Effects of Highly Conductive PH1000 Anode Combining with  
Ethylene Glycol Additive and H<sub>2</sub>SO<sub>4</sub> Immersion Treatments on  
Photovoltaic Performance and Photo stability of Polymer Solar  
Cells**

Zhiyong Liu<sup>a\*</sup> and Ning Wang<sup>b\*</sup>

<sup>a</sup>College of Science, Shenyang Agricultural University, Shenyang 110866, People's Republic of China

<sup>b</sup>Key Laboratory of Physics and Technology for Advanced Batteries (Ministry of Education), College of Physics, Jilin University, Changchun 130012, China

\*Corresponding authors: (zhylu2006@hotmail.com (Z.Y. Liu); ningwang@jlu.edu.cn (N. Wang))

## **2. Experimental details**

### **2.1 Materials**

PH1000 solution and PEDOT:PSS solution (CLEVIOS™ AI 4083) were purchased from H. C. Starck, ethylene glycol (EG) 1,8-Diiodooctane (DIO), isopropyl alcohol, H<sub>2</sub>SO<sub>4</sub> and o-dichlor-obenzene (ODCB) were purchased from Sigma-Aldrich. PTB7 was purchased from 1-material Inc. PC<sub>71</sub>BM and the PFN were purchased from Luminescence Technology Corp. MoO<sub>3</sub>, Ag, Al and Au were purchased from Alfa Aesar Co. ZnO nanoparticles were synthesized following the Pacholski method <sup>1</sup>.

The PH1000 solutions were diluted by blend solution of isopropyl alcohol and deionized water, and the PH1000 concentration is 30 mg ml<sup>-1</sup> and was filtered through a 0.45 μm syringe filter to remove large-size particles. PTB7:PC<sub>71</sub>BM (1:1.5, w:w, the PTB7 concentration of 10 mg ml<sup>-1</sup>) were dissolved in ODCB solution. 3 wt% (1,8-diiodooctane (DIO) were used as additive. The PFN were dissolved in methanol solutions and add a small amount of acetic acid (the PFN and acetic acid concentration are 0.2 mg ml<sup>-1</sup> in methanol 2 μl ml<sup>-1</sup> respectively).

### **2.2 Device preparation and characteristics**

The glass substrate and ITO glass were ultrasonicated washing treatment, the dried under a stream of nitrogen and UV-ozone treatment for 15 min. PH1000 solution were mixed with EG as additive (the EG concentration is 8 wt%) and the PH1000-EG solution was spin-cast onto 3×3 cm<sup>2</sup> glasses substrates and to fabricated the PH1000-EG layer based on glass substrate, and then dried at 120 °C for 15 min at the air condition and the thickness is around 30 nm. For the post-treatments, the PH1000-EG

layer were immersed into the  $\text{H}_2\text{SO}_4$  solutions for 10 min. Then, the PH1000-EG- $\text{H}_2\text{SO}_4$  layer were sufficiently washed in a deionized water bath to remove the residual EG and  $\text{H}_2\text{SO}_4$  solution and dried at 120 °C for 10 min to remove residual water. The control ITO/PEDOT:PSS composite anode were fabricated by spin-coating PEDOT:PSS solution (AI 4083) on the top of ITO glass and dried at 120 °C for 10 min at the air condition. After transferring to a nitrogen-filled glove box, PTB7:PC<sub>71</sub>BM photoactive layer were formed by spin coating their blend solution at 1400 rpm for 60 s and then annealed at 130 °C for 15 min. After that, the PFN solutions were spin-coated on the top of PTB7:PC<sub>71</sub>BM layer and thermal annealed at 130 °C for 5 min to form PFN layer. The Al layer was deposited on the PFN film by thermal evaporation under  $10^{-4}$  Pa through a shadow mask to define the photoactive area of the devices ( $3\times 3$  mm<sup>2</sup>). The PH1000-EG- $\text{H}_2\text{SO}_4$ -based PSCs and control PSCs structure are shown at figure S1a and b. The average photovoltaic parameter values are calculated by the five devices.

The current-voltage ( $J$ - $V$ ) characteristics were measured in a glovebox under 100  $\text{mW}\cdot\text{cm}^{-2}$  simulated AM 1.5 G irradiation and using a standard source measurement unit (Keithley 2400). All the measurements were performed in a glove box at room temperature. The external quantum efficiency ( $EQE$ ) was detected under monochromatic illumination.

The SCLC devices were fabricated according to the above procedure. The SCLC hole-only device with the structure of PH1000-EG- $\text{H}_2\text{SO}_4$ /PTB7:PC<sub>71</sub>BM/Au. The control hole-only SCLC device have a structure of ITO/PEDOT:PSS (AI

4083)/PTB7:PC<sub>71</sub>BM/Au. The dark current of the SCLC devices was measured by the below formula <sup>2</sup>:

$$J_D = \frac{9}{8} \varepsilon_0 \varepsilon_r \mu_e \frac{V^2}{L^3}$$

Where  $\varepsilon_0$  and  $\varepsilon_r$  are the permittivity of free space and relative permittivity of the material (the  $\varepsilon_r$  value are assumed to be 3), and  $L$  is the distance between anode and cathode and the value was measured using step profiler. The devices structure are shown at figure S1c.

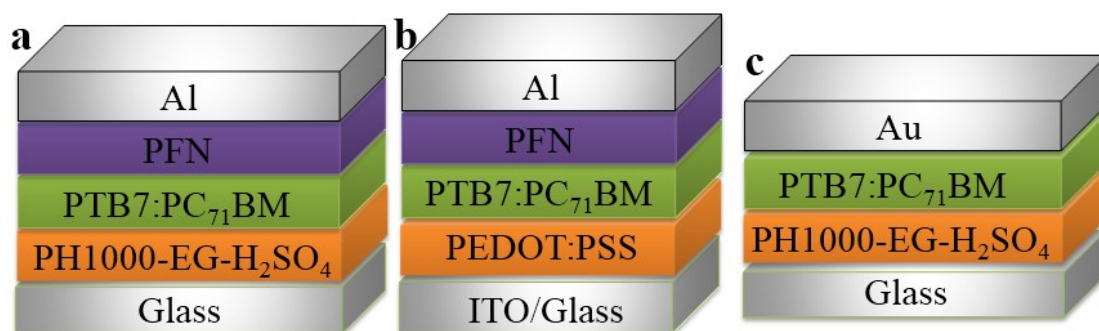

**Figure S1.** The schematic diagram of PH1000-EG-H<sub>2</sub>SO<sub>4</sub>-based PSCs and control PSCs for (a) and (b), hole-only SCLC devices configuration for (b).

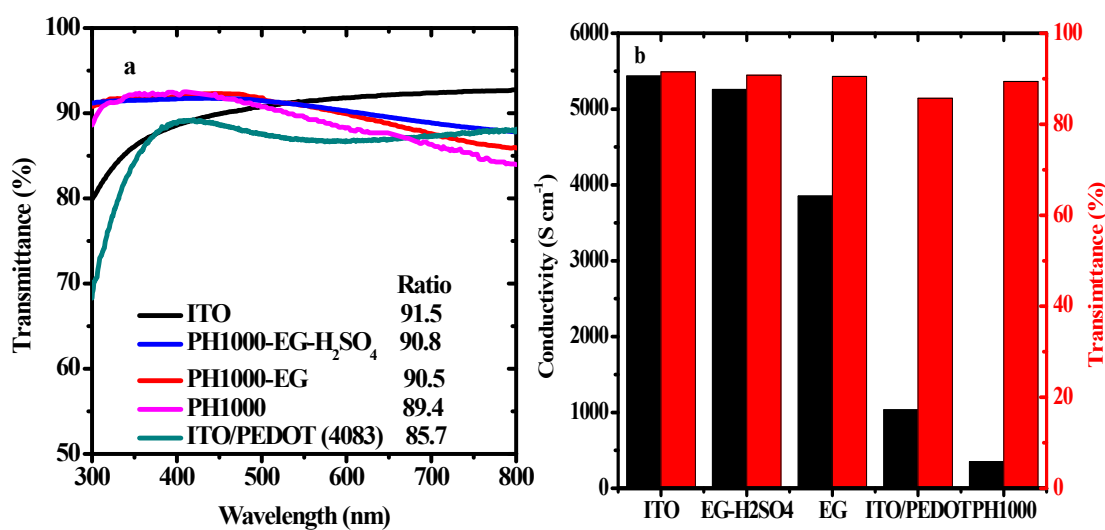

**Figure S2.** Transmittance spectra and transmittance ratio (%) of neat PH100, clean ITO, PH1000-EG-H<sub>2</sub>SO<sub>4</sub> thin films, PH1000-EG thin films and ITO glass with

PEDOT:PSS (AI 4083) coating thin films (a). Transmittance ratio and Conductivity ( $\text{S cm}^{-1}$ ) (b).

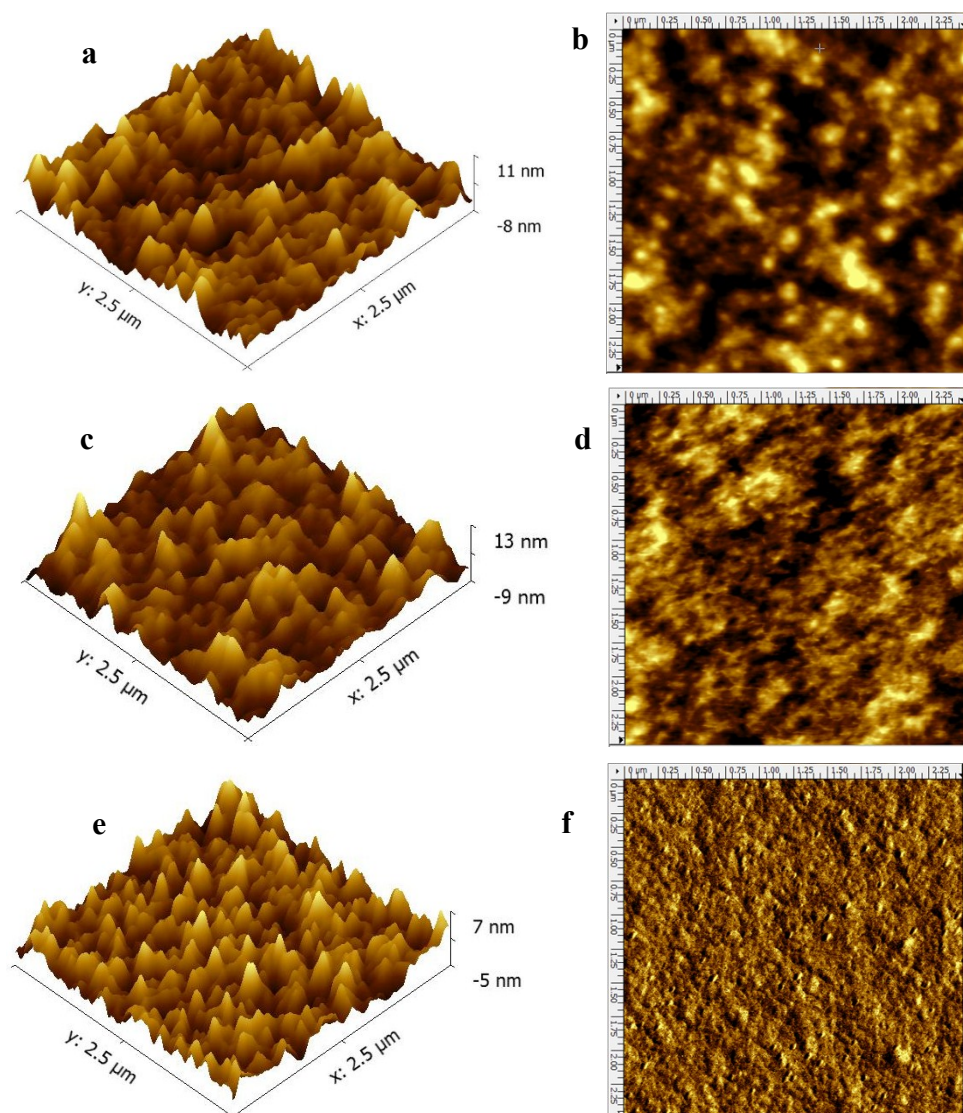

**Figure S3.** 3D AFM images and phase images for the three PH1000 thin films. (a and b) neat PH1000 thin films; (c and d) PH1000-EG thin films; (e and f) PH1000-EG- $\text{H}_2\text{SO}_4$  thin films.

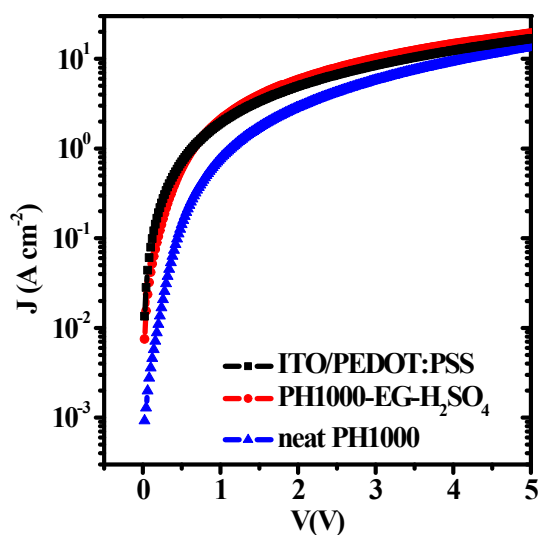

**Figure S4.**  $J$ - $V$  characteristic curves based on the neat PH1000 and PH1000-EG- $\text{H}_2\text{SO}_4$  thin films as transparent electrodes for hole-only current, and the control SCLC devices with the ITO/PEDOT:PSS (AI 4083) as the transparent electrode.

**Table S1.** Calculated hole mobilities ( $\mu_h$ ) from Figure S4.

| Transparent Electrode              | $\mu_h$<br>[ $\times 10^{-3} \text{ cm}^2\text{V}^{-1}\text{s}^{-1}$ ] |
|------------------------------------|------------------------------------------------------------------------|
| ITO/PEDOT-PSS                      | 3.54                                                                   |
| PH1000-EG- $\text{H}_2\text{SO}_4$ | 3.88                                                                   |
| neat PH1000                        | 1.13                                                                   |

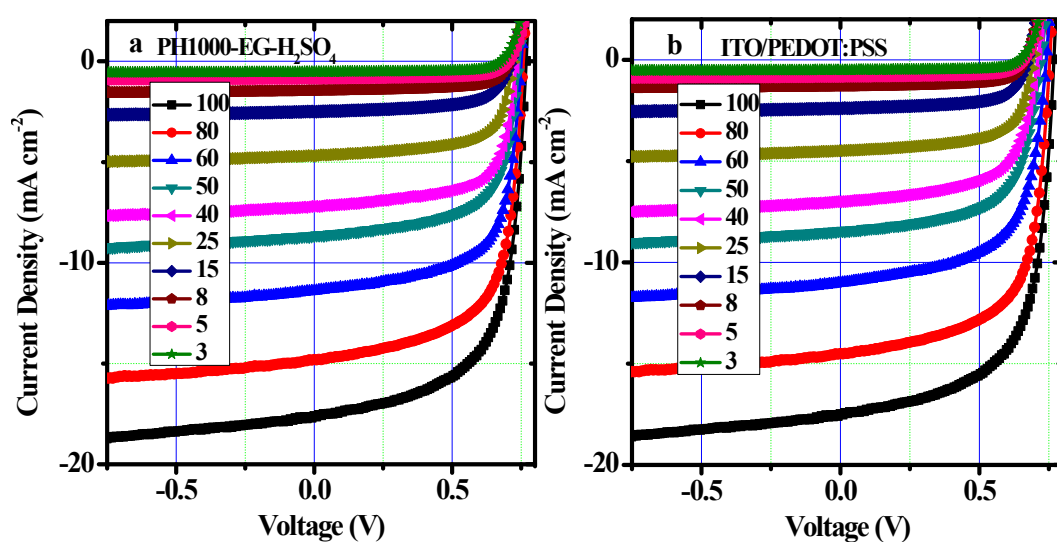

**Figure S5.**  $J$ - $V$  curves of PSCs with PH1000-EG- $\text{H}_2\text{SO}_4$  as the transparent electrode

(a) and ITO/PEDOT:PSS as the transparent electrode (b) under different illumination intensities, as obtained from standard AM 1.5G illumination.

## Reference:

1. W. Yu, L. Huang, D. Yang, P. Fu, L. Zhou, J. Zhang and C. Li, *Journal of Materials Chemistry A*, 2015, **3**, 10660-10665.
2. J. Ye, L. Zhu, L. Zhou, X. Liu, X. Zhang, H. Zheng, G. Liu, Z. Shao, X. Pan and S. Dai, *Solar Energy*, 2016, **136**, 505-514.
